# Supplementary material for: Sedproxy: a forward model for sediment-archived climate proxies
Source: Copernicus journal article supplement (doi:10.5194/cp-14-1851-2018), 2018-11-30
Supplement: Supplementary file 2 [file cp-14-1851-2018-supplement.zip]

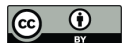

## *Supplement of*

# **Sedproxy: a forward model for sediment-archived climate proxies**

**Andrew M. Dolman and Thomas Laepple**

*Correspondence to:* Andrew M. Dolman ([andrew.dolman@awi.de](mailto:andrew.dolman@awi.de))

- cp-14-1851-2018-supplement-title-page.pdf
- S1-source-for-analysis-and-figures.zip
- S2-sedproxy\_0.6.tar.gz
- \_\_MACOSX
  - .\_S1-source-for-analysis-and-figures.zip
  - .\_S2-sedproxy\_0.6.tar.gz

The copyright of individual parts of the supplement might differ from the CC BY 4.0 License.
